# Supplementary material for: Diagnostic Performance of Ultra-Low-Dose Computed Tomography for Detecting Asbestos-Related Pleuropulmonary Diseases: Prospective Study in a Screening Setting
Source: PLoS One. 2016 Dec 29;11(12):e0168979. doi: 10.1371/journal.pone.0168979 (PMC5199059; doi:10.1371/journal.pone.0168979)
Supplement: S2 Table — (XLSX) [file pone.0168979.s002.xlsx]

## Sheet: TABLE 6
	S2 TABLE: ULD's DIAGNOSTIC PERFORMANCE FOR EACH READER
	Criteria	TP	TN	FP	FN	Sensitivity		Specificity		Postive Predictive Value		Negative Predictive Value		Accuracy		Error rate
						Value	CI	Value	CI	Value	CI	Value	CI	Value	CI	Value	CI
	Global abnormalities
	Senior reader	8	46	0	1	0.888889	51,8% - 99,7%	1	92,3% - 100%	1	63,1% - 100%	0.978723	88,7% - 99,9%	0.981818	90,3% - 100%	0.0181818	0,0% - 8,3%
	Junior reader	11	44	0	0	1	71,5% - 100%	1	92,0% - 100%	1	92,0% - 100%	1	69,2% - 100%	1	93,5% - 100%	0	0,0% - 5,3%
	Non calcified pleural plaques
	Senior reader	10	43	0	2	0.833333	51,6% - 97,9%	1	91,8% - 100%	1	73,5% - 100%	0.955556	91,8% - 100%	0.963636	93,5% - 100%	0.0363636	0,0% - 5,3%
	Junior reader	12	43	0	0	1	73,5% - 100%	1	91,8% - 100%	1	73,5% - 100%	1	91,8% - 100%	1	93,5% - 100%	0	0,0% - 5,3%
	Calcified pleural plaques
	Senior reader	6	49	0	0	1	54,1% - 100%	1	92,7% - 100%	1	54,1% - 100%	1	92,7% - 100%	1	93,5% - 100%	0	0,0% - 5,3%
	Junior reader	6	49	0	0	1	54,1% - 100%	1	92,7% - 100%	1	54,1% - 100%	1	92,7% - 100%	1	93,5% - 100%	0	0,0% - 5,3%
	Diffuse pleural thickening
	Senior reader	2	52	1	0	1	15,8% - 100 %	0.981132	89,9% - 100%	0.666667	9,4% - 99,2%	1	93,2% - 100%	0.981818	90,3% - 100,0%	0.0181818	0,0% - 8,3%
	Junior reader	4	51	0	0	1	39,7% - 100%	1	93,0% - 100%	1	39,7% - 100%	1	93,0% - 100%	1	93,5% - 100,0%	0	0,0% - 5,3%
	Asbestosis
	Senior reader	4	49	0	2	0.666667	22,3% - 94,7%	1	92,7% - 100%	1	39,8% - 100%	0.960784	86,5% - 99,5%	0.963636	87,5% - 100%	0.0363636	0% - 11%
	Junior reader	2	52	0	1	0.666667	9,4% - 99,4%	1	93,0% - 100%	1	15,8% - 100%	0.981132	89,9% - 100%	0.981818	90,3% - 100%	0.0181818	0,0% - 8,3%
	Significant lung nodules
	Senior reader	2	53	0	0	1	15,8% - 100%	1	93,3% - 100%	1	15,8% - 100%	1	93,3% - 100%	1	93,5% - 100%	0	0,0% - 5,3%
	Junior reader	3	52	0	0	1	29,2% - 100%	1	93,2% - 100%	1	29,2% - 100%	1	93,2% - 100%	1	93,5% - 100%	0	0,0% - 5,3%
